# Supplementary material for: Regulation of nerve growth and patterning by cell surface protein disulphide isomerase
Source: eLife. 2020 May 28;9:e54612. doi: 10.7554/eLife.54612 (PMC7269675; doi:10.7554/eLife.54612)
Supplement: Supplementary file 1. [file elife-54612-supp1.xlsx]

## Sheet: Supplementary Table 1 (3)
	SUPPLEMENTARY TABLE 1
	Figure	Treatment	n	Test	Value	Test	Value
	1b-f	Representative images	15
	Supp. 1b	128nM PDI: 7 determinations, 3 enzyme batches		Two-way RM ANOVA > Bonferroni's multiple comparison test (128nM PDI vs 64nM PDI)	p > 0.999 all comparisons
		64nM PDI: 7 determinations, 5 enzyme batches
		32nM PDI: 5 determinations, 3 enzyme batches
		12nM PDI + PNA agarose: 4 determinations, 2 enzyme batches, 2 PNA-agarose batches
	2b	n=144 embryos	144
	2c,d	n=24/149 embryos showed abnormal phenotype	149
	2e,f	PACMA31: n=14/29 embryos abnormal phenotype	29
	2g	PACMA56: n=19/20 embryos normal phenotype	20
	Supp. 2a-d	Representative images of 15 replicates	15
	Supp. 2e-g	Representative images of 4 replicates	4
	ABNORMAL SPROUT ASSAY
	Supp. 2i	siRNA	9
		siRNA + 1μg plasmid	10	Mann-Whitney test (vs siRNA)	p = 0.0028
		siRNA + 2μg plasmid	9	Mann-Whitney test (vs siRNA)	p = 0.0019
	Supp. 2l	Ventral root PACMA31	8
		Ventral root PACMA56	10	Mann-Whitney test (vs PACMA31)	p < 0.01
	Supp. 2n	Dorsal root PACMA31	8
		Dorsal root PACMA56	10	Mann-Whitney test (vs PACMA31)	p < 0.001
	Supp. 2o	Ventral root width (PACMA31)	12	Mann-Whitney test (vs PACMA56)	p < 0.001
		Ventral root width (PACMA56)	9
		Untreated	10	Mann-Whitney test (vs Untreated)	p < 0.001
	COLLAPSE ASSAYS
	3a	PBS	6	1-way ANOVA Kruskal-Wallis test	p = 0.482
		Liposomes	7
		PDI 25ng/ml	3
		PDI 50ng/ml	3
		PDI 100ng/ml	3
		PDI 500ng/ml	3
		PDI 1000ng/ml	3
	3b	PBS	10
		PDI (125ng/ml)	8	Mann-Whitney test (vs PBS)	p < 0.0001
		GSNO (1μM)	8	Mann-Whitney test (vs PBS)	p < 0.0001
		PDI+GSNO	10	Mann-Whitney test (vs PBS)	p < 0.0001
	3c	PBS	8
		Liposomes	7
		Somite extract (SE)	12
		SE + 5μM PACMA31	18	Mann-Whitney test (vs SE)	p < 0.0001
		SE + 5μM PACMA56	11	Mann-Whitney test (vs SE)	p = 0.137	Mann-Whitney test (vs PACMA31)	p < 0.0001
	3d	PBS	7	Mann-Whitney test (vs PDI+GSNO)	p = 0.0003
		DTT (3mM)	5	Mann-Whitney test (vs PDI+GSNO)	p = 0.0016
		L-homocysteine (3mM)	5	Mann-Whitney test (vs PDI+GSNO)	p = 0.0016
		PDI+GSNO	8
		PDI+GSNO + GSH (3μM)	4
		PDI+GSNO + GSH (3mM)	4	Mann-Whitney test (vs PDI+GSNO)	p = 0.004
		PDI+GSNO + DTT (3mM)	6
		PDI+GSNO + L-homocysteine (3mM)	6	Mann-Whitney test [vs L-homocysteine (3mM)]	p = 0.002
	3e	PBS	4	Mann-Whitney test (vs Dialysis supernatent)	p = 0.40
		Dialysis supernatant	3
		SE	7	Mann-Whitney test (vs PBS)	p = 0.0061	Mann-Whitney test (vs Dialysis supernatant)	p = 0.0167
		SE + GSH (3mM)	5	Mann-Whitney test (vs PBS)	p = 0.0159	Mann-Whitney test (vs SE)	p = 0.0025
		SE + L-homocysteine	5	Mann-Whitney test (vs SE)	p = 0.3434	Mann-Whitney test [vs SE + GSH (3mM)]	p = 0.0079
	3f	PBS	9	Mann-Whitney test (vs SE)	p = 0.0142
		Liposomes	9	Mann-Whitney test (vs PDI+GSNO)	p < 0.0001	Mann-Whitney test (vs SE)	p = 0.0012
		PDI+GSNO	8
		PDI+GSNO + myoglobin	12	Mann-Whitney test (vs PDI+GSNO)	p < 0.0001
		SE	9	Mann-Whitney test (vs PDI+GSNO + myoglobin)	p = 0.0009	Mann-Whitney test [vs SE + myoglobin (20μM)]	p = 0.040
		SE + myoglobin (20μM)	9
	3g	PBS	6	Mann-Whitney test (vs PDI+GSNO)	p = 0.0043
		GSNO (1μM)	4	Mann-Whitney test (vs PBS)	p > 0.999
		PDI (500ng/ml)	4	Mann-Whitney test (vs PBS)	p = 0.257
		PDI+GSNO	6	Mann-Whitney test (vs PDI+GSNO + C-PTIO)	p = 0.013
		C-PTIO (20μM)	6
		C-PTIO + GSNO	6
		PDI + C-PTIO	6
		PDI+GSNO + C-PTIO	6	Mann-Whitney test (vs PBS)	p = 0.132
	3h	PBS	11
		Liposomes	14
		PBS + L-NAME	10	Mann-Whitney test (vs PBS)	p = 0.2437
		PBS + D-NAME	7	Mann-Whitney test (vs PBS)	p = 0.2463	Mann-Whitney test (vs PBS + L-NAME)	p = 0.906
		SE	9
		SE + L-NAME	15	Mann-Whitney test (vs SE)	p = 0.0009
		SE + D-NAME	4	Mann-Whitney test (vs SE)	p = 0.3958
		Calcimycin	5
	Supp. 3a	Each PDI concentration	3- 9	One-way ANOVA > Mann-Whitney	p < 0.01 between values
	Supp. 3b	Each PDI concentration	4	One-way ANOVA > Mann-Whitney	p < 0.01 between values
	Supp. 3c	Each time point	5- 10	One-way ANOVA > Mann-Whitney	p < 0.01 between values
	Supp. 3d	Each time point	4	One-way ANOVA > Mann-Whitney	p < 0.001 between values
	Supp. 3e	Each time point	3	One-way ANOVA > Mann-Whitney	p < 0.05 between values
	Supp. 3f	Each PDI concentration	3- 5	One-way ANOVA > Mann-Whitney	p < 0.05 between values
	Supp. 3g	PDI+GSNO	4
		PDI+GSNO + ab (10μg/ml)	8	Mann-Whitney test (vs PDI+GSNO)	p = 0.0040
	Supp. 3h	Each PDI concentration	3- 6	One-way ANOVA > Mann-Whitney
	Supp. 3i	PDI+GSNO	9
		PAO (0.4μM)	7	Mann-Whitney test (vs PDI+GSNO)	p = 0.0002
		PAO (4μM)	8	Mann-Whitney test (vs PDI+GSNO)	p < 0.0001
	Supp. 3j	Each T3 concentration	3- 5	One-way ANOVA > Mann-Whitney	p < 0.05 between values
	Supp. 3k	Each 16F16 concentration	3	One-way ANOVA > Mann-Whitney	p < 0.05 between values
	4a	PBS	7
		Liposomes	8
		RFE (50%)	10
		RFE + PACMA31 (5μM)	17	Mann-Whitney test [vs RFE (50%)]	p < 0.0001
		RFE + PACMA56	17	Mann-Whitney test [vs RFE (50%)]	p < 0.0001
	4b	PBS	14
		Liposomes	15
		RFE (50%)	33
		RFE + Rutinoside (0.1μM)	6
		RFE + Rutinoside (1μM)	4	Mann-Whitney test [vs RFE (50%)]	p = 0.0292
		RFE + Rutinoside (50μM)	26	Mann-Whitney test [vs RFE (50%)]	p < 0.0001
	4c	PBS	13
		Liposomes	18
		RFE (50%)	18	Mann-Whitney test (vs Liposomes)	p < 0.0001
		RFE + anti-PDI	22	Mann-Whitney test [vs RFE (50%)]	p < 0.0001
		RFE + IgG	20	Mann-Whitney test [vs RFE (50%)]	p = 0.3651
		RFE + BSA	10	Mann-Whitney test [vs RFE (50%)]	p = 0.5478
	4d	PBS	17
		Liposomes	18
		RFE (50%)	18	Mann-Whitney test (vs Liposomes)	p < 0.0001
		RFE + GSH (3mM)	20	Mann-Whitney test [vs RFE (50%)]	p < 0.0001
		RFE + GSH (3μM)	6	Mann-Whitney test [vs RFE (50%)]	p = 0.7603
		RFE + GSH + L-homocysteine (3mM)	7	Mann-Whitney test [vs RFE + GSH (3μM)]	p = 0.9452
		RFE + DTT (3mM)	12	Mann-Whitney test [vs RFE (50%)]	p = 0.8595
	4e	Representative images of 3 replicates
	Supp. 4a	PBS	9	Mann-Whitney test [vs RFE (50%)]	p < 0.0001
		Liposomes	14	Mann-Whitney test [vs RFE (50%)]	p < 0.0001
		RFE (50%)	20	Mann-Whitney test [vs RFE + BSA]	p = 0.0223
		RFE + BSA	9	Mann-Whitney test [vs RFE (50%)]	p < 0.0001
		RFE + Jacalin	27	Mann-Whitney test (vs RFE + BSA)	p < 0.0001
	Supp. 4b	PACMA31 concentration	5-27	One-way ANOVA > Mann-Whitney	p < 0.01 between values or p<0.001
	Supp. 4c	Each GSH concentration	6-19	One-way ANOVA > Tukey comparison test	p < 0.01 between values or p<0.0001
	Supp. 4d	PBS	9
		Liposomes	12
		RFE	8	Mann-Whitney test (vs Myoglobin)	p < 0.0001
		RFE + myoglobin	14	Mann-Whitney test (vs RFE)	p = 0.0022
		Myoglobin	15	Mann-Whitney test (vs RFE + myoglobin)	p = 0.0714
	Supp. 4e	Liposomes	5	Mann-Whitney test [vs C-PTIO (20mM)]	p = 0.8329
		C-PTIO (20mM)	8
		C-PTIO (100mM)	6	Mann-Whitney test (vs Liposomes)	p = 0.5368
		RFE	6	Mann-Whitney test [vs RFE + C-PTIO (20mM)]	p = 0.0519
		RFE + C-PTIO (20mM)	5	Mann-Whitney test (vs Liposomes)	p = 0.0556
		RFE + C-PTIO (100mM)	7	Mann-Whitney test (vs Liposomes)	p = 0.0101	Mann-Whitney test (vs RFE)	p = 0.0140
	Supp. 4f	PBS	34
		Liposomes	45
		1718 cell extract	37	Mann-Whitney test (vs Liposomes)	p < 0.0001
		1718 extract + PNA	27	Mann-Whitney test (vs Liposomes)	p = 0.3934
		1718 extract + Jacalin	32	Mann-Whitney test (vs Liposomes)	p = 0.8714
		1718 extract + BSA	53	Mann-Whitney test (vs Liposomes)	p < 0.0001
	Supp. 4h	PBS	10
		PDI (500ng/ml)+GSNO (1μM)	11	Mann-Whitney test (vs PBS)	p < 0.0001
